# Supplementary material
Source: publisher figshare collection journal article supplement (https://sage.figshare.com/ndownloader/files/23681552)
Supplement: Supplementary file 1 [file 23681552]

**Supplementary Table S2:** Operative detail where assistance provided by experienced surgeon in first 50 cases.

| **Case number** | **Operative details** |
| --- | --- |
| 12 | Assistance with left-sided prostatic pedicle/bundle due to adhesion to peri-prostatic structures |
| 16 | Assistance with posterior bladder neck dissection due to uncertainty over plane of dissection and adhesions to per-prostatic structures |
| 30 | Assistance with post bladder neck dissection due to uncertainty over plane of dissection |
| 39 | Assistance with post bladder neck dissection due to uncertainty over plane of dissection |
